# Supplementary material for: Seedless preparation of Au nanorods by hydroquinone assistant and red blood cell membrane camouflage
Source: Royal Society of Chemistry journal article supplement (doi:10.1039/c8ra03795g), 2018-01-01
Supplement: c8ra03795g1.pdf [file c8ra03795g1.pdf]

This file replaces the original Supporting Information published on 11<sup>th</sup> June 2018 in which an incorrect version of Figure S2a was included. Figure S2a was corrected on 22<sup>nd</sup> December 2020.

**Supporting Information:**

**Seedless Preparation of Au Nanorods by Hydroquinone Assistant and Red Blood Cell Membranes Camouflage**

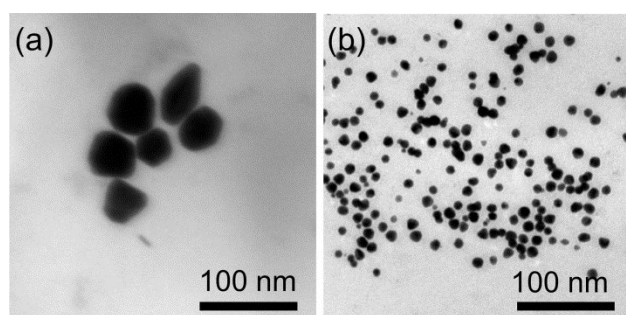

**Figure S1.** TEM images of the AuNRs that were prepared with the addition of 0  $\mu\text{L}$  (a), and 60  $\mu\text{L}$  (b) 10 mM  $\text{NaBH}_4$ . The amount of 0.05 M CTAB, 100 mM  $\text{HAuCl}_4$ , 0.1 M  $\text{AgNO}_3$ , and 30 mM HQ was fixed at 10 mL, 50  $\mu\text{L}$ , 100  $\mu\text{L}$ , and 1 mL, respectively.

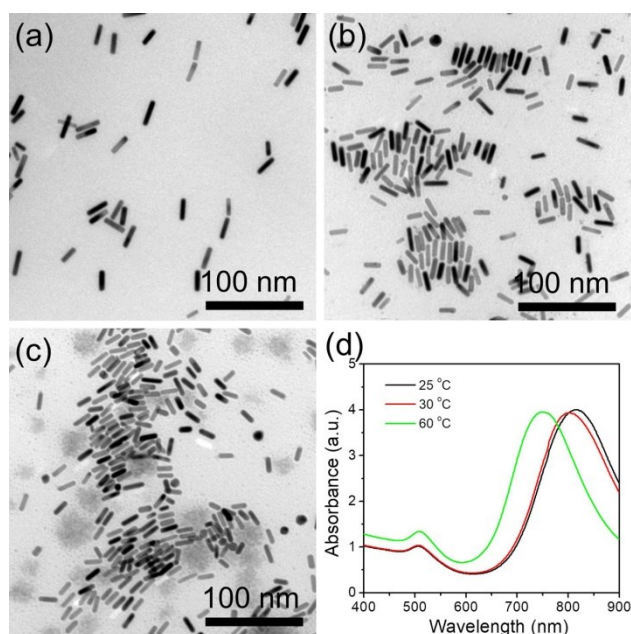

**Figure S2.** TEM images (a)-(c) and UV-vis-NIR absorption spectra (f) of the AuNRs prepared at different temperatures from 25 to 60 °C. The amount of 0.05 M CTAB, 100 mM HAuCl<sub>4</sub>, 0.1 M AgNO<sub>3</sub>, 30 mM HQ, and 10 mM NaBH<sub>4</sub> was 10 mL, 50 μL, 100 μL, 1 mL, and 15 μL, respectively.

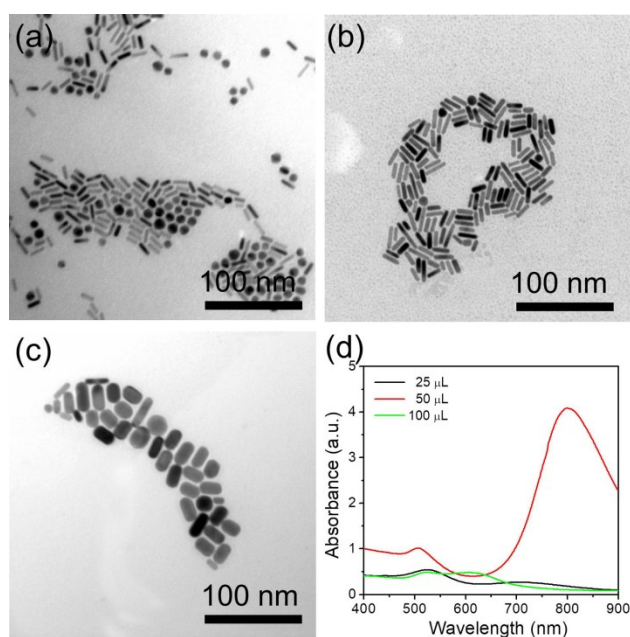

**Figure S3.** TEM images (a-c) and UV-vis-NIR absorption spectra (d) of the AuNRs were prepared with the addition of 100 mM HAuCl<sub>4</sub> from 25 μL to 100 μL. The amount of 0.05 M CTAB, 0.1 M AgNO<sub>3</sub>, 30 mM HQ, and 10 mM NaBH<sub>4</sub> was fixed at 10 mL, 100 μL, and 1 mL, and 15 μL, respectively.

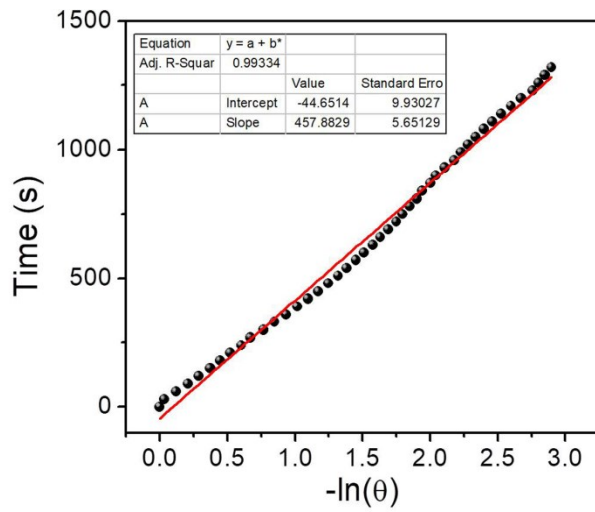

**Figure S4.** Time constant for heat transfer from the system is calculated to be  $\tau_s = 457.88$  s by applying the linear time data from the cooling period *versus* negative natural logarithm of driving force temperature, which is obtained from Figure 6d.

The photothermal transduction efficiency was calculated by  $\eta = \frac{hS(T_{Max} - T_{Surr}) - Q_{dis}}{I(1 - 10^{-A_{808}})}$

the  $\eta$  of 40  $\mu\text{g/mL}$  AuNRs with the LSPR peak at 800 nm ( $28 \times 7$  nm) under the 1.5  $\text{W/cm}^2$  808 nm laser irradiation was calculated to be 80 %.

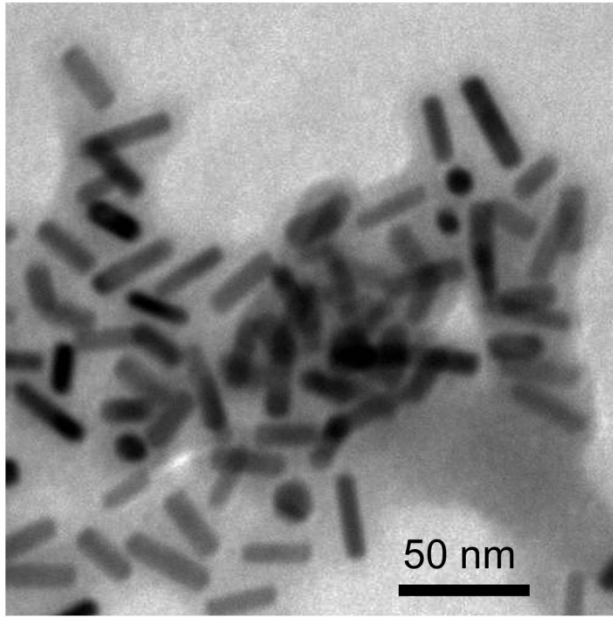

**Figure S5.** TEM image of RBCM-AuNRs after storing in PBS for 2 days.
